# Supplementary material for: A Comparison of the Nutritional Qualities of Supermarket’s Own and Regular Brands of Bread in Sweden
Source: MDPI journal article supplement (doi:10.3390/nu12041162), 2020-04-22
Supplement: s1 [file s1]

**Supplementary Table S1.** The six different food categories in the Health Star Rating (HSR) system. Bread products are assigned to category 2.

|             |                                                                    |
|-------------|--------------------------------------------------------------------|
| Category 1  | Beverages other than dairy beverages                               |
| Category 1D | Dairy beverages                                                    |
| Category 2  | All foods other than those included in Category 1, 1D, 2D, 3 or 3D |
| Category 2D | Dairy foods other than those included in Category 1D or 3D         |
| Category 3  | Oils and spreads                                                   |
| Category 3D | Cheese and processed cheese (with calcium content >320mg/100g)     |

**Supplementary Table S2.** Health Star Rating (HSR) Baseline Points for Category 1, 1D, 2 or 2D Foods.

| Baseline points | Average energy content (kJ) per 100 g or 100 mL | Average saturated fatty acids (g) per 100 g or 100 mL | Average total sugars (g) per 100 g or 100 mL | Average sodium (mg) per 100 g or 100 mL |
|-----------------|-------------------------------------------------|-------------------------------------------------------|----------------------------------------------|-----------------------------------------|
| 0               | ≤335                                            | ≤1.0                                                  | ≤5.0                                         | ≤90                                     |
| 1               | >335                                            | >1.0                                                  | >5.0                                         | >90                                     |
| 2               | >670                                            | >2.0                                                  | >9.0                                         | >180                                    |
| 3               | >1005                                           | >3.0                                                  | >13.5                                        | >270                                    |
| 4               | >1340                                           | >4.0                                                  | >18.0                                        | >360                                    |
| 5               | >1675                                           | >5.0                                                  | >22.5                                        | >450                                    |
| 6               | >2010                                           | >6.0                                                  | >27.0                                        | >540                                    |
| 7               | >2345                                           | >7.0                                                  | >31.0                                        | >630                                    |
| 8               | >2680                                           | >8.0                                                  | >36.0                                        | >720                                    |
| 9               | >3015                                           | >9.0                                                  | >40.0                                        | >810                                    |
| 10              | >3350                                           | >10.0                                                 | >45.0                                        | >900                                    |
| 11              | >3685                                           | >11.2                                                 | >49.0                                        | >1005                                   |
| 12              |                                                 | >12.5                                                 | >54.0                                        | >1121                                   |
| 13              |                                                 | >13.9                                                 | >58.0                                        | >1251                                   |
| 14              |                                                 | >15.5                                                 | >63.0                                        | >1397                                   |
| 15              |                                                 | >17.3                                                 | >67.0                                        | >1559                                   |
| 16              |                                                 | >19.3                                                 | >72.0                                        | >1740                                   |
| 17              |                                                 | >21.6                                                 | >76.0                                        | >1942                                   |
| 18              |                                                 | >24.1                                                 | >81.0                                        | >2168                                   |
| 19              |                                                 | >26.9                                                 | >85.0                                        | >2420                                   |
| 20              |                                                 | >30.0                                                 | >90.0                                        | >2701                                   |
| 21              |                                                 | >33.5                                                 | >94.0                                        | >3015                                   |
| 22              |                                                 | >37.4                                                 | >99.0                                        | >3365                                   |
| 23              |                                                 | >41.7                                                 |                                              | >3756                                   |
| 24              |                                                 | >46.6                                                 |                                              | >4192                                   |
| 25              |                                                 | >52.0                                                 |                                              | >4679                                   |
| 26              |                                                 | >58.0                                                 |                                              | >5223                                   |
| 27              |                                                 | >64.7                                                 |                                              | >5829                                   |
| 28              |                                                 | >72.3                                                 |                                              | >6506                                   |
| 29              |                                                 | >80.6                                                 |                                              | >7262                                   |
| 30              |                                                 | >90                                                   |                                              | >8106                                   |

The information is available at: <http://healthstarrating.gov.au/internet/healthstarrating/publishing.nsf/Content/guide-for-industry-document>.

**Supplementary Table S3.** Health Star Rating (HSR) Protein, Fiber and Fruit/Vegetable/Nuts/Legumes Points.

| Points | Protein (g) per 100 g or 100 mL | Dietary fiber (g) per 100 g or 100 mL | % concentrated fruit or vegetables | % fruit vegetable nuts and legumes |
|--------|---------------------------------|---------------------------------------|------------------------------------|------------------------------------|
| 0      | ≤1.6                            | ≤0.9                                  | <25                                | ≤40                                |
| 1      | >1.6                            | >0.9                                  | ≥25                                | >40                                |
| 2      | ≥3.2                            | >1.9                                  | ≥43                                | >60                                |
| 3      | >4.8                            | >2.8                                  | ≥52                                | >67                                |
| 4      | >6.4                            | >3.7                                  | ≥63                                | >75                                |
| 5      | >8.0                            | >4.7                                  | ≥67                                | >80                                |
| 6      | >9.6                            | >5.4                                  | ≥80                                | >90                                |
| 7      | >11.6                           | >6.3                                  | ≥90                                | >95                                |
| 8      | >13.9                           | >7.3                                  | 100                                | 100                                |
| 9      | >16.7                           | >8.4                                  |                                    |                                    |
| 10     | >20.0                           | >9.7                                  |                                    |                                    |
| 11     | >24.0                           | >11.2                                 |                                    |                                    |
| 12     | >28.9                           | >13.0                                 |                                    |                                    |
| 13     | >34.7                           | >15.0                                 |                                    |                                    |
| 14     | >41.6                           | >17.3                                 |                                    |                                    |
| 15     | >50.0                           | >20.0                                 |                                    |                                    |

The information is available at: <http://healthstarrating.gov.au/internet/healthstarrating/publishing.nsf/Content/guide-for-industry-document>.

**Supplementary Table S4.** Final scores used to assign Heath Star Ratings (HSR) depending on which food category the packaged product is assigned to. Packaged bread products belong to category 2.

| <b>Health<br/>Star<br/>Rating</b> | <b>Food<br/>Category<br/><br/>1 Non-dairy<br/>beverage</b> | <b>Food<br/>Category<br/><br/>1D Dairy<br/>beverage</b> | <b>Food<br/>Category<br/><br/>2 Non-dairy<br/>foods</b> | <b>Food<br/>Category<br/><br/>2D Dairy<br/>foods</b> | <b>Food<br/>Category<br/><br/>3 Oils and<br/>spreads</b> | <b>Food<br/>Category<br/><br/>3D Cheese<br/>&gt;320 mg<br/>Ca/100g</b> |
|-----------------------------------|------------------------------------------------------------|---------------------------------------------------------|---------------------------------------------------------|------------------------------------------------------|----------------------------------------------------------|------------------------------------------------------------------------|
| 5                                 | ≤ -6                                                       | ≤ -2                                                    | ≤ -11                                                   | ≤ -2                                                 | ≤ 13                                                     | ≤ 22                                                                   |
| 4.5                               | -5                                                         | -1                                                      | -10 to -7                                               | -1                                                   | 14 to 16                                                 | 23 to 24                                                               |
| 4                                 | -4                                                         | 0                                                       | -6 to -2                                                | 0                                                    | 17 to 20                                                 | 25 to 26                                                               |
| 3.5                               | -3                                                         | 1                                                       | -1 to 2                                                 | 1                                                    | 21 to 23                                                 | 27 to 28                                                               |
| 3                                 | -2                                                         | 2                                                       | 3 to 6                                                  | 2                                                    | 24 to 27                                                 | 29 to 30                                                               |
| 2.5                               | -1                                                         | 3                                                       | 7 to 11                                                 | 3                                                    | 28 to 30                                                 | 31 to 32                                                               |
| 2                                 | 0                                                          | 4                                                       | 12 to 15                                                | 4                                                    | 31 to 34                                                 | 33 to 34                                                               |
| 1.5                               | 1                                                          | 5                                                       | 16 to 20                                                | 5                                                    | 35 to 37                                                 | 35 to 36                                                               |
| 1                                 | 2                                                          | 6                                                       | 21 to 24                                                | 6                                                    | 38 to 41                                                 | 37 to 38                                                               |
| 0.5                               | ≥3                                                         | ≥7                                                      | ≥25                                                     | ≥7                                                   | ≥42                                                      | ≥39                                                                    |

The information is available at: <http://healthstarrating.gov.au/internet/healthstarrating/publishing.nsf/Content/guide-for-industry-document>.
